# Supplementary material for: Adaptive kinetic Monte Carlo simulation of solid oxide fuel cell components
Source: Royal Society of Chemistry journal article supplement (doi:10.1039/c4ta01504e), 2014-01-01
Supplement: c4ta01504e1.pdf [file c4ta01504e1.pdf]

The adaptive kinetic Monte Carlo code DL\_AKMC can be found at <http://ccpforge.cse.rl.ac.uk/gf/project/kmc/>

## 1 Initial starting arrangement

We have investigated the effect of the initial starting arrangement of dopant cations and anion vacancies on the ionic conductivities of YSZ, CSZ, SDC and GDC over the same dopant concentrations used in the paper. The configurations used were; ‘associated’, where the anion vacancies are nearest neighbours to the dopant cations; ‘unassociated’, where dopant cations and anion vacancies were separated by a minimum of 4.5Å; ‘random’, where the dopant cations and anion vacancies are randomly distributed through the material. The ionic conductivities of each of these arrangements at each dopant concentration was determined after adaptive kinetic Monte Carlo simulation (using a procedure identical to that in the paper) and representative results for YSZ are shown in Figure 1.

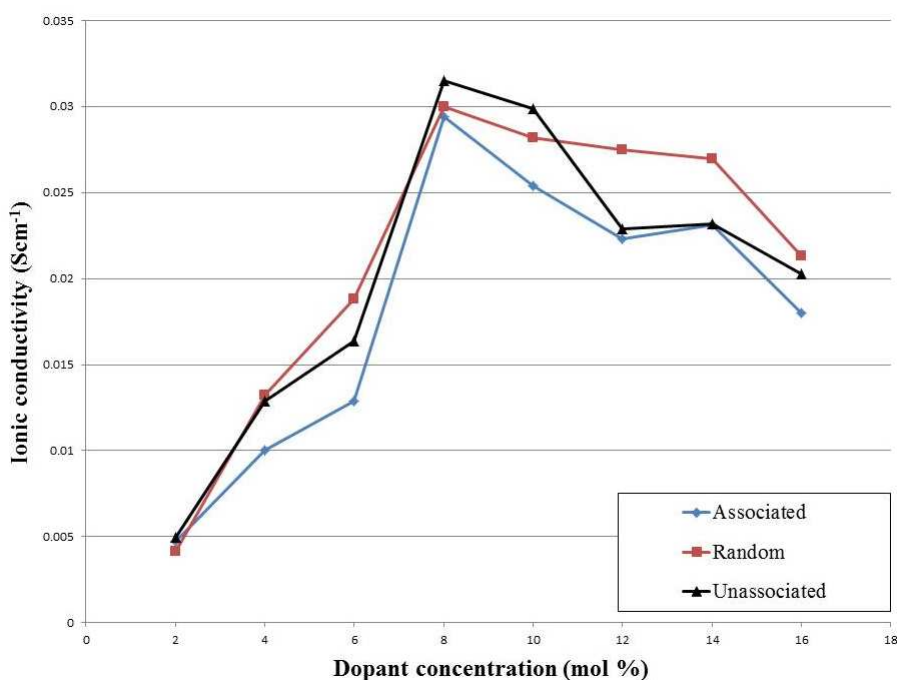

**Figure 1** Ionic conductivities for YSZ from the three different starting configurations.

From Figure 1 it can be seen that the general form of the ionic conductivity versus dopant concentration curve is maintained regardless of the starting configuration, and the magnitude of the ionic conductivity does not vary dramatically between arrangements. The other materials investigated exhibited similar closeness in magnitude and form of their conductivity curves.

## 2 Radial Distribution Function

For further interest we present in Figure 2 the radial distribution function (RDF) for Gd-Gd in 10 mol% GDC.

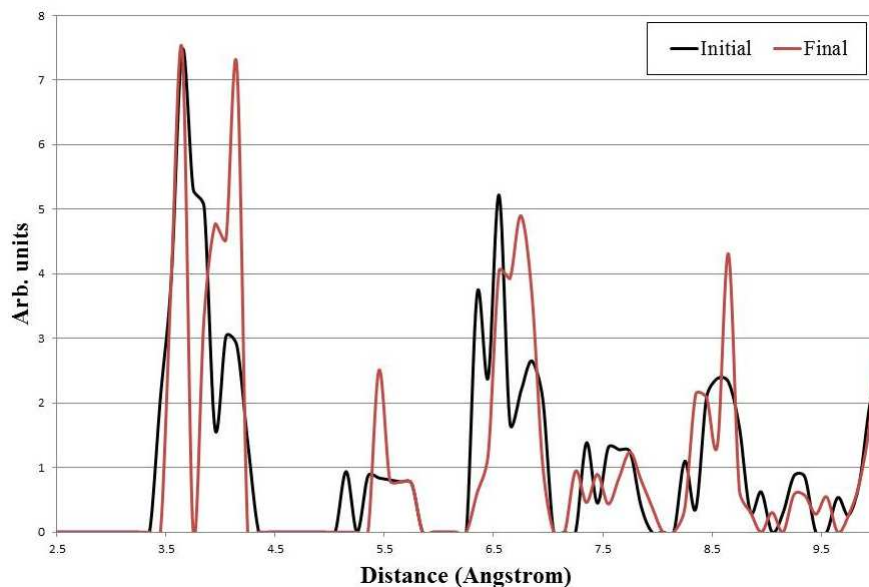

**Figure 2** Radial distribution functions at the beginning of the simulation (initial) and at the end (final) for Gd-Gd in the ‘random’ configuration for 10 mol% GDC.

Figure 2 illustrates that the Gd-Gd distance tends to decrease over the course of the simulation, leading to possible Gd clustering. This effect is seen to a greater or lesser extent regardless of initial configuration, but does not appear to affect the ionic conductivity significantly.

### 3 Potential Parameter Verification

Tables 1, 2 and 3 show values of representative physical parameters calculated using the potential set listed in the main text, along with values for related binary oxide materials for comparison.

**Table 1** Calculated and experimental bulk properties of representative binary oxides.

| Property                         | ZrO <sub>2</sub> |                      | CeO <sub>2</sub> |                      | LaCoO <sub>3</sub> |                      | CaO   |                      |
|----------------------------------|------------------|----------------------|------------------|----------------------|--------------------|----------------------|-------|----------------------|
|                                  | Calc.            | Expt. <sup>1,2</sup> | Calc.            | Expt. <sup>3-5</sup> | Calc.              | Expt. <sup>6,7</sup> | Calc. | Expt. <sup>8,9</sup> |
| Lattice parameter, $a$ (Å)       | 5.127            | 5.127                | 5.386            | 5.406                | 3.839              | 3.823                | 4.812 | 4.810                |
| Bulk modulus (GPa)               | 278              | 185                  | 263              | 236                  | 255                | 150                  | 136   | 114                  |
| Elastic constant, $C_{11}$ (GPa) | 596              | 401                  | 521              | 403                  | 410                | -                    | 211   | 223                  |

**Table 2** Calculated and experimental bulk properties of representative binary oxides.

| Property                         | SrO   |                        | Y <sub>2</sub> O <sub>3</sub> |                     | Gd <sub>2</sub> O <sub>3</sub> |                     | Sm <sub>2</sub> O <sub>3</sub> |                     |
|----------------------------------|-------|------------------------|-------------------------------|---------------------|--------------------------------|---------------------|--------------------------------|---------------------|
|                                  | Calc. | Expt. <sup>10,11</sup> | Calc.                         | Expt. <sup>12</sup> | Calc.                          | Expt. <sup>13</sup> | Calc.                          | Expt. <sup>14</sup> |
| Lattice parameter, $a$ (Å)       | 5.160 | 5.162                  | 10.362                        | 10.603              | 10.435                         | 10.819              | 10.923                         | 10.928              |
| Bulk modulus (GPa)               | 102   | 91                     | 184                           | 150                 | 196                            | 188                 | 163                            | 149                 |
| Elastic constant, $C_{11}$ (GPa) | 155   | 170                    | 284                           | 224                 | 294                            | -                   | 244                            | -                   |

**Table 3** Calculated and related experimental bulk properties of 10 mol % doped zirconias, 15 mol % doped cerias and 50 mol % doped LCO.

| Property                         | ZrO <sub>2</sub>     | 10-YSZ | 10-CSZ | CeO <sub>2</sub>     | 15-GDC | 15-SDC | LaCoO <sub>3</sub>   | 50-LSCO |
|----------------------------------|----------------------|--------|--------|----------------------|--------|--------|----------------------|---------|
|                                  | Expt. <sup>1,2</sup> | Calc.  | Calc.  | Expt. <sup>3-5</sup> | Calc.  | Calc.  | Expt. <sup>6,7</sup> | Calc.   |
| Lattice parameter, $a$ (Å)       | 5.127                | 5.158  | 5.173  | 5.406                | 5.412  | 5.420  | 3.823                | 3.873   |
| Bulk modulus (GPa)               | 185                  | 217    | 211    | 236                  | 236    | 232    | 150                  | 196     |
| Elastic constant, $C_{11}$ (GPa) | 401                  | 514    | 441    | 403                  | 449    | 443    | -                    | 291     |

## 4 Migration pathway

Included for interest is a representative anion vacancy migration pathway along the (100) direction in 20 mol % GDC (Figure 3). The majority of diffusion occurs in this direction due to the presence of the applied field. In this example, the activation barrier was found to be 0.27 eV.

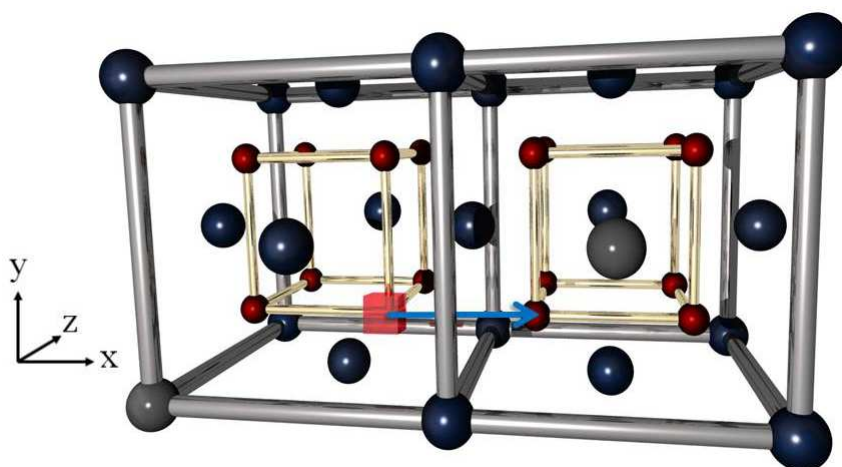

**Figure 3** Representative anion vacancy migration pathway along the (100) direction in 20 mol % GDC. The large, blue atoms are Ce, the large, grey atoms are Gd, and the smaller red atoms are oxygen. The oxygen vacancy is shown as a red transparent cube. Not all atoms included in the simulation are shown here.

## References

- [1] A. Rabenau. *Z. Anorg. Allg. Chem.*, 288:221, 1956.
- [2] P.J. Botha, J.C.H. Chiang, J.D. Comins, P.M. Mjwara, and P.E. Ngoepe. *J. Appl. Phys.*, 73:7268, 1993.
- [3] S.J. Duclos, Y.K. Vohra, A.L. Ruoff, A. Jayaraman, and G.P. Espinosa. *Phys. Rev. B*, 38:7755, 1988.
- [4] L. Gerward and J. Staun Olsen. *Powder Diffr.*, 8:127, 1993.
- [5] A. Nakajima, A. Yoshihara, and M. Ishigma. *Phys. Rev. B*, 50:13297, 1994.
- [6] M.S. Islam. *Solid State Ionics*, 154:75, 2002.
- [7] T. Vogt, J.A. Hriljac, N.C. Hyatt, and P. Woodward. *Phys. Rev. B*, 67:140401, 2003.
- [8] M.J. Mehl, R.J. Hemley, and L.L. Boyer. *Phys. Rev. B*, 33:8685, 1986.
- [9] Z.P. Chang and E.K. Graham. *J. Phys. Chem. Solids*, 38:1355, 1977.
- [10] L.-G. Liu and W.A. Bassett. *J. Geophys. Res.*, 77:4934, 1972.
- [11] T.J. Ahrens. *Mineral Physics & Crystallography: A Handbook of Physical Constants*. American Geophysical Union, USA, 1995.
- [12] J.W. Palko, W.M. Kriven, S.V. Sinogeikin, J.D. Bass, and A. Sayir. *J. Appl. Phys.*, 89:7791, 2001.
- [13] F.X. Zhang, M. Lang, J.W. Wang, and R.C. Becker, U. Ewing. *Phys. Rev. B*, 78:064114, 2008.
- [14] S. Jiang, J. Liu, C. Lin, X. Li, and Y. Li. *J. Appl. Phys.*, 113:113502, 2013.
